# Supplementary material for: The relationship between physical activity and out-of-pocket health care costs of the elderly in Europe
Source: Oxford University Press journal article supplement (doi:10.1093/eurpub/ckaa045), 2020-02-12
Supplement: ckaa045_supplementary_data.docx [file ckaa045_supplementary_data.docx]

Table A1

|  | Full Sample | | Female | | | Male | |
| --- | --- | --- | --- | --- | --- | --- | --- |
|  | Prob.  (Logit) | Cond.  (GLM) | Prob.  (Logit) | | Cond.  (GLM) | Prob.  (Logit) | Cond.  (GLM) |
| *Physical activity* |  |  |  | |  |  |  |
| More than once a week | -0.176*** | -0.259*** | -0.141*** | | -0.226*** | -0.211*** | -0.300*** |
| Once a week | -0.082*** | -0.270*** | -0.066*** | | -0.214*** | -0.105*** | -0.350*** |
| Less than once a week | -0.036 | -0.239*** | -0.008 | | -0.225*** | -0.076 | -0.261*** |
| *Socio-demographics* |  |  |  | |  |  |  |
| Age | 0.075*** | -0.121*** | 0.062*** | | -0.131*** | 0.103*** | -0.084*** |
| Age2 | -0.000*** | 0.001*** | -0.000*** | | 0.001*** | -0.001*** | 0.001*** |
| Female | 0.232*** | 0.074*** |  | |  |  |  |
| Married | -0.083*** | -0.146*** | -0.121*** | | -0.112*** | -0.061*** | -0.233*** |
| Tertiary education | 0.109*** | 0.223*** | 0.058*** | | 0.218*** | 0.141*** | 0.226*** |
| Employed | -0.006 | -0.320*** | -0.031 | | -0.328*** | -0.023 | -0.277*** |
| Retired | 0.057*** | -0.201*** | 0.043 | | -0.180*** | -0.019 | -0.225*** |
| HH Income | 0.120*** | 0.131*** | 0.112*** | | 0.136*** | 0.131*** | 0.117*** |
| Immigrant | -0.123*** | -0.016 | -0.114*** | | 0.056 | -0.135*** | -0.093*** |
| Nr. of children | -0.013*** | -0.046*** | -0.025*** | | -0.044*** | -0.002 | -0.050*** |
| Household size | -0.020*** | 0.018 | -0.029*** | | 0.043*** | -0.012 | -0.004 |
| Health system types | Yes | Yes | Yes | | Yes | Yes | Yes |
| Macroeconomic indicators | Yes | Yes | Yes | | Yes | Yes | Yes |
| Constant | -2.720*** | 9.713*** | -1.824*** | | 9.949*** | -3.891*** | 8.620*** |
| Observations | 94,267 | 66,672 | 51,695 | 37,654 | | 42,572 | 29,018 | |

Two-part models for total out-of-pocket costs without endogenous health and insurance control variables

*Note:* Displayed are the coefficients; all models are estimated with robust standard errors; ****p*<0.001*, **p*<0.01*, *p*<0.05*.* Reference categories are: *Never* (physical activity), *Supply- and performance-oriented private systems* (Health system types).
